# Supplementary material for: Construction of chiral-2D/3D perovskite heterojunction films for efficient circularly polarized light detection
Source: Royal Society of Chemistry journal article supplement (doi:10.1039/d3tc01534c), 2023-01-01
Supplement: d3tc01534c1.pdf [file d3tc01534c1.pdf]

Supporting Information

## **Construction of Chiral-2D/3D Perovskite Heterojunction Films for Efficient Circularly Polarized Light Detection**

Liting Tao<sup>1#</sup>, Wei Tang<sup>2#</sup>, Minxing Yan<sup>1</sup>, Li Ding<sup>1</sup>, Jiajun Wei<sup>1</sup>, Lixiang Wang<sup>1</sup>, Liqi Li<sup>1</sup>,  
Linjun Li<sup>2\*</sup>, Deren Yang<sup>1,4</sup>, and Yanjun Fang<sup>1,3,4\*</sup>

<sup>1</sup>State Key Laboratory of Silicon Materials, School of Materials Science and Engineering,  
Zhejiang University, Hangzhou 310027, P. R. China

<sup>2</sup>State Key Laboratory of Modern Optical Instrumentation, College of Optical Science and  
Engineering, Zhejiang University, Hangzhou 310027, P. R. China

<sup>3</sup>Shanxi-Zheda Institute of Advanced Materials and Chemical Engineering, Taiyuan, 030024,  
P. R. China

<sup>4</sup>Shangyu Institute of Semiconductor Materials, Shaoxing, 312366, P. R. China

\*E-mail: [jkfang@zju.edu.cn](mailto:jkfang@zju.edu.cn); [lilinjun@zju.edu.cn](mailto:lilinjun@zju.edu.cn)

# L.T. and W.T. contributed equally to this work

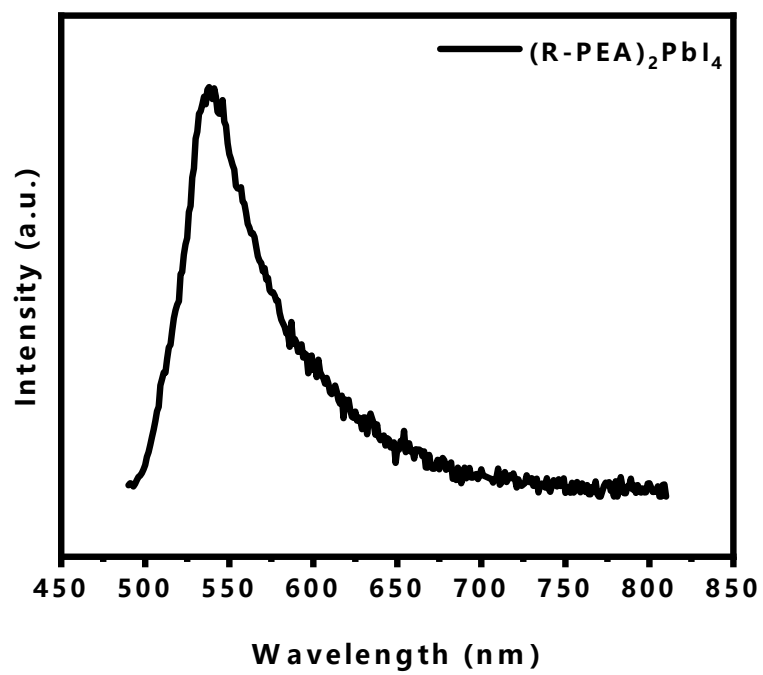

Figure S1. Photoluminescence spectrum of  $(R-\alpha\text{-PEA})_2\text{PbI}_4$  film.

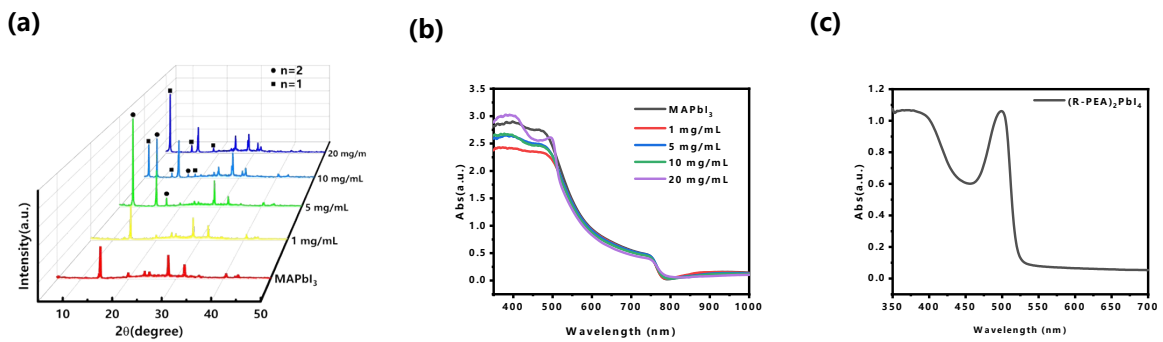

Figure S2. (a,b) XRD patterns (a) and absorption spectra (b) of 3D and (R- $\alpha$ -PEA)I-treated samples with four different concentrations (1, 5, 10, 20 mg/mL). (c) The absorption spectrum of (R- $\alpha$ -PEA)<sub>2</sub>PbI<sub>4</sub> film.

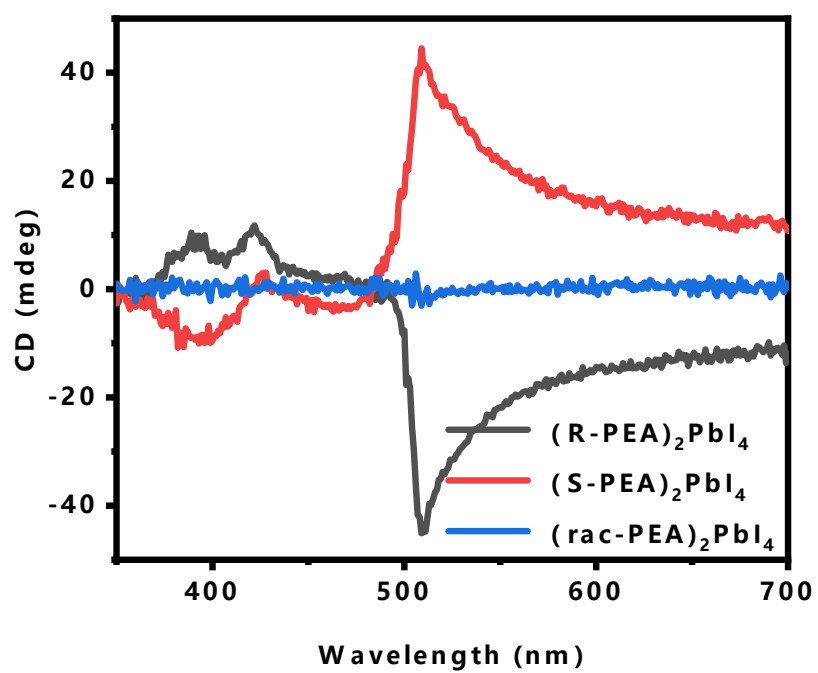

Figure S3. CD spectra of (R- $\alpha$ -PEA)<sub>2</sub>PbI<sub>4</sub>, (S- $\alpha$ -PEA)<sub>2</sub>PbI<sub>4</sub> and (rac- $\alpha$ -PEA)<sub>2</sub>PbI<sub>4</sub> films.

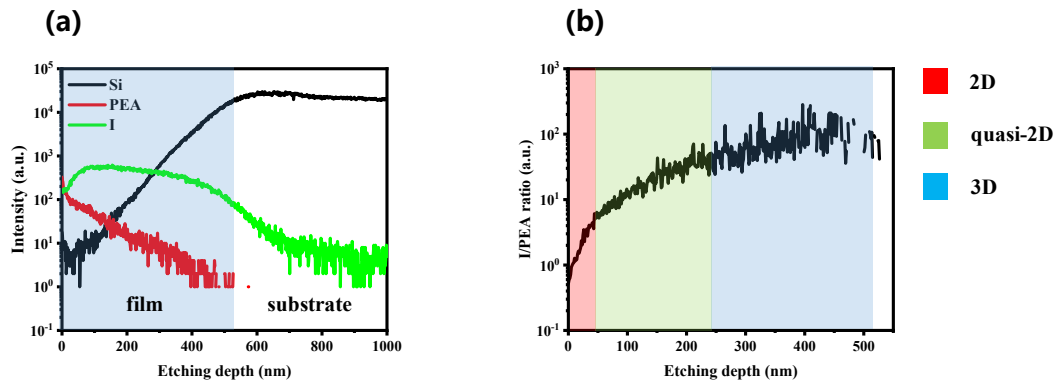

Figure S4. (a) Raw intensity profiles of Si, PEA, I in the 120s-cycle1 sample measured by TOF-SIMS. (b)

Relative intensity ratio of I/PEA with different etching times.

Based on the I to PEA relative ratio as a function of etching depth shown above, the phase distribution along the vertical direction can be divided into three regions. The quasi-2D phases with small  $n$  values are mainly presented on the surface of the films with the thickness of  $\sim 50$  nm, while the next is the transition zone from small to large  $n$  phases with the thickness of about 200 nm. And the bottom part of the film shows large and nearly constant I/PEA ratio, which can be assigned to the 3D perovskite phase with the thickness of around 250 nm.

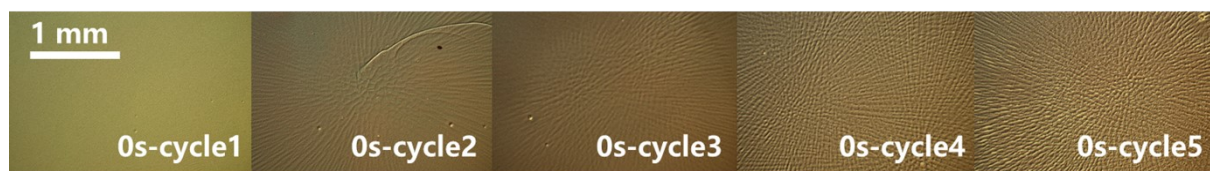

Figure S5. The optical microscope images of chiral-2D/3D films spin-coated with 1-5 cycles of (R- $\alpha$ -PEA)I solution.

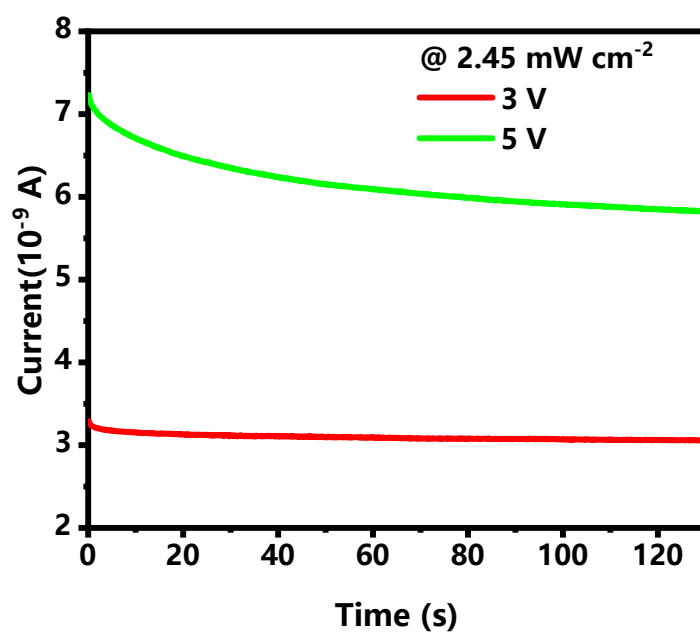

Figure S6. The photocurrent output of chiral-2D/3D detectors under the bias of 3 V and 5 V, respectively, with the incident light intensity of  $2.45 \text{ mW cm}^{-2}$ .

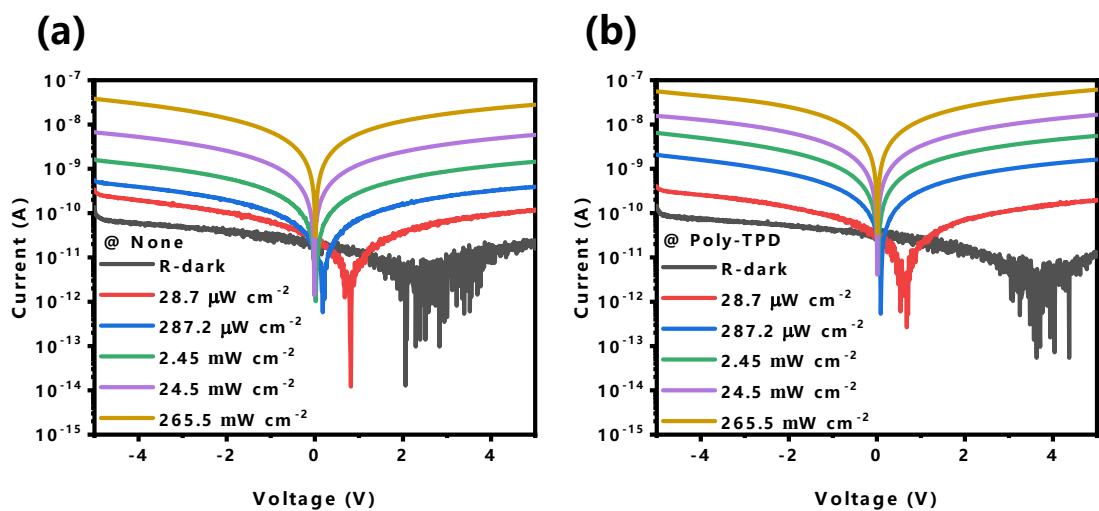

Figure S7. (a, b)  $I$ - $V$  curves of the devices without (a) and with Poly-TPD interlayer (b) under illumination of a 505 nm laser with different intensities at a bias of 3 V.
